# Supplementary material for: A Network Structural Approach to the Link Prediction Problem
Source: Atypon-hosted journal article supplement (doi:10.1287/ijoc.2014.0624), 2015-03-25
Supplement: ijoc.2014.0624-sm-linkpred_online.pdf [file ijoc.2014.0624-sm-linkpred_online.pdf]

# Online Supplement to “A Network Structural Approach to the Link Prediction Problem”

Chungmok Lee

IBM Research–Ireland, Damastown Industrial Park, Mulhuddart, Dublin 15, Ireland / RUTCOR, Rutgers University,  
Piscataway, New Jersey 08854, USA, chungmok@gmail.com,

Minh Pham

RUTCOR, Rutgers University, Piscataway, New Jersey 08854, USA, ptuanminh@gmail.com,

Myong K. Jeong

RUTCOR, Rutgers University, Piscataway, New Jersey 08854, USA, mjeong@rci.rutgers.edu,

Dohyun Kim

Department of Industrial & Management Engineering, Myongji University, 116 Myongji-ro, Cheoin-gu, Yongin, Gyunggi-do,  
South Korea, norman.kim@gmail.com,

Dennis K. J. Lin

Department of Statistics, Eberly College of Sciences, Pennsylvania State University, University Park, Pennsylvania 16802,  
USA, dennislin@psu.edu,

Wanpracha Art Chavalitwongse

Departments of Industrial & Systems Engineering and Radiology, University of Washington, Seattle, Washington 98195, USA,  
artchao@uw.edu,

## Appendix A: Proof of Theorem 1

The problem is clearly in NP because the maximum weight  $b$ -matching problem can be solved in a polynomial time (Anstee 1987). For showing NP-completeness, we use a reduction from SAT. For any instance of SAT, let  $U = \{u_1, u_2, \dots, u_p\}$  and  $C = \{c_1, c_2, \dots, c_q\}$  denote the set of variables and the set of clauses, respectively. We construct graph  $G(V, E)$  and parameters as follows.

$$\begin{aligned}
 V &= V_c \cup V_o \cup V_r \cup V_t \cup \left\{ \bigcup_{i=1, \dots, p} V_u^i \right\}, \\
 V_c &= \{v_1^c, v_2^c, \dots, v_q^c\}, \\
 V_o &= \{v_{1,1}^o, v_{1,2}^o, \dots, v_{1,q}^o, v_{2,1}^o, v_{2,2}^o, \dots, v_{2,q}^o, \dots, v_{q,1}^o, v_{q,2}^o, \dots, v_{q,q}^o\}, \\
 V_u^1 &= \{v_1^u, v_1^{-u}\}, \\
 V_u^2 &= \{v_2^u, v_2^{-u}\}, \\
 &\vdots \\
 V_u^p &= \{v_p^u, v_p^{-u}\}, \\
 V_r &= \{v_1^r, v_2^r, \dots, v_p^r\}, \\
 V_t &= \{v_{1,1}^t, v_{1,2}^t, \dots, v_{1,q}^t, v_{2,1}^t, v_{2,2}^t, \dots, v_{2,q}^t, \dots, v_{p,1}^t, v_{p,2}^t, \dots, v_{p,q}^t\},
 \end{aligned}$$

$$\begin{aligned}
 E &= E_{c,o} \cup E_{r,t} \cup E_{u,r} \cup E_{c,u} \cup E_{c,\neg u}, \\
 E_{c,o} &= \{\{v_i^c, v_{i,j}^o\} \mid i = 1, \dots, q, j = 1, \dots, q\}, \\
 E_{r,t} &= \{\{v_i^r, v_{i,j}^t\} \mid i = 1, \dots, p, j = 1, \dots, q\}, \\
 E_{u,r} &= \{\{v_i^u, v_i^r\} \mid i = 1, \dots, p\} \cup \{\{v_i^{-u}, v_i^r\} \mid i = 1, \dots, p\}, \\
 E_{c,u} &= \{\{v_i^c, v_j^u\} \mid j = 1, \dots, p, i = 1, \dots, q, \text{ and clause } c_i \text{ contains variable } u_j\}, \\
 E_{c,\neg u} &= \{\{v_i^c, v_j^{-u}\} \mid j = 1, \dots, p, i = 1, \dots, q, \text{ and clause } c_i \text{ contains variable } \neg u_j\}, \\
 s_e &= \begin{cases} 1, & \text{if } e \in E_{c,u} \cup E_{c,\neg u} \\ M, & \text{if } e \in E_{c,o} \cup E_{r,t}, \quad \forall e \in E, \\ N, & \text{if } e \in E_{u,r} \end{cases} \\
 \hat{b}_i &= \begin{cases} q + 1, & \text{if } i \in V_c \cup V_o \cup V_r \cup V_t \cup \{v_1^u, v_2^u, \dots, v_p^u\} \\ 0, & \text{if } i \in \{v_1^{-u}, v_2^{-u}, \dots, v_p^{-u}\} \end{cases}, \quad \forall i \in V, \\
 L &= (q^2 + pq)M + pN + q,
 \end{aligned}$$

where  $N := 2pq + 1$  and  $M := 2pN + 1$ . Note that there can be at most  $2pq$  edges with edge score 1 (i.e.,  $s_e = 1$ ) while exactly  $q^2 + pq$  edges and  $2p$  edges have edge scores  $M$  and  $N$ , respectively.

Figure A.1 illustrates an example of the reduction.

CLAIM A.1. *For any permutation  $P$ ,  $F(s, P\hat{b}) \leq L$  holds.*

Assume that for some permutation  $\hat{P}$  we have  $F(s, \hat{P}\hat{b}) > L$  with matching solution  $\hat{x}$ . It is obvious that  $\hat{x}_e = 1$  for all  $e \in E_{c,o} \cup E_{r,t}$  so that  $(\hat{P}\hat{b})_i = q + 1$  for all  $i \in V_c \cup V_r$ , that implies  $\sum_{e \in E_{u,r}} \hat{x}_e = q$ . Thus,  $F(s, \hat{P}\hat{b}) = (q^2 + pq)M + pN + \sum_{e \in E_{c,u} \cup E_{c,\neg u}} \hat{x}_e = L - q + \sum_{e \in E_{c,u} \cup E_{c,\neg u}} \hat{x}_e$ . By assumption, we have  $\sum_{e \in E_{c,u} \cup E_{c,\neg u}} \hat{x}_e > q$  that means there is  $i^* \in V_c$  such that  $(\hat{P}\hat{b})_{i^*} > q + 1$  which derives a contradiction.

Let  $\mathbb{P}$  be the set of all permutation matrices. And let  $\hat{\mathbb{P}} := \{P \in \mathbb{P} \mid (P\hat{b})_i = q + 1, \text{ for all } i \in V_o \cup V_c \cup V_r \cup V_t, \text{ and } (P\hat{b})_{v_j^u} + (P\hat{b})_{v_j^{-u}} = q + 1 \text{ for all } j = 1, \dots, p\}$ , i.e.,  $\hat{\mathbb{P}}$  is a set of perturbations that all nodes in  $V_o \cup V_c \cup V_r \cup V_t$  have degree constraints of  $q + 1$  and exactly one of two nodes in  $V_u^j$  has node degree constraint of  $q + 1$ .

CLAIM A.2.  *$P \in \hat{\mathbb{P}}$  if and only if  $F(s, P\hat{b}) \geq L - q$ .*

The sufficient condition is obvious. For showing the necessary condition, assume that there exists  $P^* \in \mathbb{P} \setminus \hat{\mathbb{P}}$  such that  $F(s, P^*\hat{b}) \geq L - q$ . It is clear that  $(P^*\hat{b})_i = q + 1$  for all  $i \in V_o \cup V_c \cup V_r \cup V_t$  (otherwise  $F(s, P^*\hat{b}) \leq L - M$ ). Since  $P^* \in \mathbb{P} \setminus \hat{\mathbb{P}}$  there is some  $i^*$  such that  $(P^*\hat{b})_{v_{i^*}^u} + (P^*\hat{b})_{v_{i^*}^{-u}} = 0$  that implies  $F(s, P^*\hat{b}) \leq L - N$  which derives a contradiction.

CLAIM A.3. *If  $P \in \hat{\mathbb{P}}$ ,  $F(s, P\hat{b}) = L - q + \sum_{e \in E_{c,u} \cup E_{c,\neg u}} x_e^*$ , where  $x^*$  is a solution of  $b$ -matching problem  $F(s, P\hat{b})$ .*

This is clear by Claim A.2.

For any permutation  $P \in \hat{\mathbb{P}}$ , define truth assignment  $T_P : U \rightarrow \{true, false\}$  as follows.

$$T_P(i) = \begin{cases} true, & \text{if } (P\hat{b})_{v_i^u} = q + 1 \text{ and } (P\hat{b})_{v_i^{-u}} = 0; \\ false, & \text{if } (P\hat{b})_{v_i^u} = 0 \text{ and } (P\hat{b})_{v_i^{-u}} = q + 1. \end{cases}, \text{ for all } i = 1, \dots, p.$$

We now claim that  $C$  is satisfiable if and only if there is a permutation matrix  $\tilde{P}$  such that  $F(s, \tilde{P}\hat{b}) = L$ .

For a sufficient condition, assume that  $C$  is satisfiable for truth assignment  $T^*$ . We consider a permutation matrix  $P^* \in \hat{\mathbb{P}}$  corresponding truth assignment  $T^*$ . By Claim A.1 and A.2, it is clear that  $L - q \leq F(s, P^*\hat{b}) \leq L$ . Let  $x^*$  be the matching solution of  $b$ -matching problem  $F(s, P^*\hat{b})$ . For each clause  $i$ , we have  $\sum_{e \in \{\{v_i^c, v_j^u\}, \{v_i^c, v_j^{-u}\} \mid j = 1, \dots, p\}} x_e^* = 1$ , because every clause in  $C$  is true and  $(P^*\hat{b})_{v_i^c} = q + 1$ . By Claim A.3, this implies  $F(s, P^*\hat{b}) = L$ .

For a necessary condition, assume that  $C$  is not satisfiable. We should show that for any  $P \in \mathbb{P}$  we have  $F(s, P\hat{b}) < L$ . Assume that, for contradiction, there exists  $\tilde{P}$  such that  $F(s, \tilde{P}\hat{b}) = L$ . By Claim A.2,  $\tilde{P} \in \hat{\mathbb{P}}$ , and by Claim A.3, we have  $\sum_{e \in E_{c,u} \cup E_{c,\neg u}} \tilde{x}_e = q$  where  $\tilde{x}$  is a solution of problem  $F(s, \tilde{P}\hat{b})$ . This means we have a truth assignment  $T_{\tilde{P}}$  that satisfies every clause in  $C$  which derives a contradiction.  $\square$

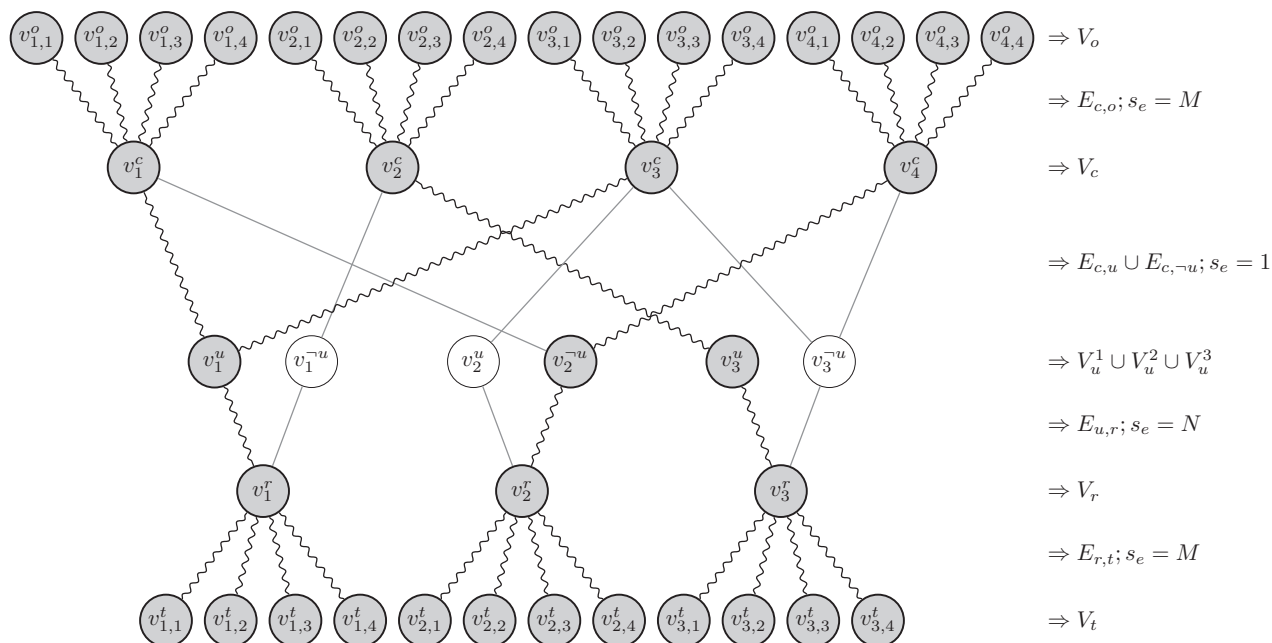

**Figure A.1** Reduction from SAT instance  $(u_1 \vee \neg u_2) \wedge (\neg u_1 \vee u_3) \wedge (u_1 \vee u_2 \vee \neg u_3) \wedge (\neg u_2 \vee \neg u_3)$ . Dark nodes ( $\odot$ ) have node degree constraints  $q+1=5$  and bright nodes ( $\ominus$ ) have node degree constraints 0. The wavy edges are the maximum weight  $b$ -matching for the current permutation of node degree constraints. The truth assignments for the SAT instance are  $u_1 = \text{true}$ ,  $u_2 = \text{false}$ , and  $u_3 = \text{true}$ .

## Appendix B: Additional AUC Results for Tested Networks

Table B.1 – B.4 show monthly AUC results for testes networks. We included the p-values of the paired and one-sided student  $t$ -test with the alternative hypothesis: the average AUC of DD approach is better than the average of SO method. The lower p-value the more likely the DD approach performed better.

## References

Anstee, R. P. 1987. A polynomial algorithm for  $b$ -matchings: an alternative approach. *Information Processing Letters* **24** 153–157.

Table B.1 Link prediction results (AUC values) for the Enron e-mail networks.

| month-year | $ E_t $ | $\hat{\alpha}$ | Static           |                  | Time-series      |                  | HRM               |                   | All               |                   |
|------------|---------|----------------|------------------|------------------|------------------|------------------|-------------------|-------------------|-------------------|-------------------|
|            |         |                | SO <sub>ST</sub> | DD <sub>ST</sub> | SO <sub>TS</sub> | DD <sub>TS</sub> | SO <sub>HRM</sub> | DD <sub>HRM</sub> | SO <sub>ALL</sub> | DD <sub>ALL</sub> |
| 5-2000     | 46      | 1.51           | <b>0.9585</b>    | 0.9486           | 0.9256           | 0.9177           | 0.9389            | 0.9194            | 0.9581            | 0.9498            |
| 6-2000     | 66      | 1.51           | <b>0.8698</b>    | 0.8544           | 0.8415           | 0.8342           | 0.8686            | 0.8553            | 0.8686            | 0.8547            |
| 7-2000     | 82      | 1.51           | 0.8826           | 0.9073           | 0.7720           | 0.8048           | 0.8880            | <b>0.9080</b>     | 0.8870            | 0.9058            |
| 8-2000     | 129     | 1.42           | 0.8844           | 0.8783           | 0.7813           | 0.7517           | 0.8784            | 0.8667            | <b>0.8845</b>     | 0.8766            |
| 9-2000     | 100     | 1.40           | 0.9648           | 0.9522           | 0.8939           | 0.8545           | 0.9509            | 0.9420            | <b>0.9726</b>     | 0.9610            |
| 10-2000    | 141     | 1.38           | 0.8804           | 0.9019           | 0.8238           | 0.8543           | 0.8723            | 0.8798            | 0.8846            | <b>0.9026</b>     |
| 11-2000    | 165     | 1.34           | 0.9507           | 0.9511           | 0.8431           | 0.8537           | 0.9253            | 0.9133            | <b>0.9523</b>     | 0.9509            |
| 12-2000    | 164     | 1.45           | 0.9455           | 0.9473           | 0.8611           | 0.9036           | 0.9283            | 0.9184            | <b>0.9520</b>     | 0.9493            |
| 1-2001     | 148     | 1.61           | 0.9258           | 0.9235           | 0.8339           | 0.8392           | 0.8558            | 0.8478            | <b>0.9269</b>     | 0.9248            |
| 2-2001     | 172     | 1.58           | 0.9606           | 0.9552           | 0.8836           | 0.8993           | 0.9472            | 0.9336            | <b>0.9647</b>     | 0.9568            |
| 3-2001     | 184     | 1.50           | 0.9700           | 0.9644           | 0.9017           | 0.9021           | 0.9389            | 0.9269            | <b>0.9745</b>     | 0.9670            |
| 4-2001     | 212     | 1.44           | 0.9039           | 0.9127           | 0.8151           | 0.8329           | 0.8806            | 0.8809            | 0.9072            | <b>0.9146</b>     |
| 5-2001     | 249     | 1.36           | 0.8163           | <b>0.8252</b>    | 0.7459           | 0.7648           | 0.8018            | 0.7984            | 0.8210            | 0.8250            |
| 6-2001     | 197     | 1.34           | 0.8146           | <b>0.8214</b>    | 0.7722           | 0.7649           | 0.7736            | 0.7730            | 0.8123            | 0.8146            |
| 7-2001     | 219     | 1.41           | 0.8381           | 0.8529           | 0.8067           | 0.7911           | 0.8679            | 0.8625            | 0.8635            | <b>0.8712</b>     |
| 8-2001     | 342     | 1.38           | 0.8534           | 0.8591           | 0.7591           | 0.7657           | 0.8146            | 0.8192            | 0.8634            | <b>0.8668</b>     |
| 9-2001     | 303     | 1.29           | 0.8800           | 0.9137           | 0.9035           | 0.8830           | 0.8631            | 0.8587            | 0.9118            | <b>0.9192</b>     |
| 10-2001    | 490     | 1.33           | 0.8679           | 0.8950           | 0.8036           | 0.8011           | 0.8327            | 0.8419            | 0.8939            | <b>0.8977</b>     |
| 11-2001    | 410     | 1.13           | 0.8358           | 0.8861           | 0.8572           | 0.8570           | 0.8786            | 0.8727            | 0.9060            | <b>0.9148</b>     |
| 12-2001    | 279     | 1.04           | 0.8594           | 0.9062           | 0.9085           | 0.9003           | 0.8916            | 0.8857            | 0.9318            | <b>0.9339</b>     |
| 1-2002     | 275     | 0.99           | 0.8295           | 0.8850           | 0.8403           | 0.8386           | 0.8457            | 0.8427            | 0.9077            | <b>0.9156</b>     |
| 2-2002     | 246     | 1.09           | 0.8245           | 0.8511           | 0.7652           | 0.8313           | 0.7890            | 0.7844            | 0.8727            | <b>0.8739</b>     |
| 3-2002     | 72      | 1.29           | 0.8298           | 0.9028           | 0.9299           | 0.9281           | 0.8441            | 0.8462            | 0.9313            | <b>0.9395</b>     |
| average    | 204.0   | 1.36           | 0.8846           | 0.8998           | 0.8378           | 0.8423           | 0.8729            | 0.8686            | 0.9065            | <b>0.9081</b>     |
| p-value    |         |                |                  | 0.0030           |                  | 0.1804           |                   | 0.9851            |                   | 0.1865            |

Table B.2 Link prediction results (AUC values) for the stock correlation networks.

| month-year               | $ E_t $ | $\hat{\alpha}$ | Static           |                  | Time-series      |                  | HRM               |                   | All               |                   |
|--------------------------|---------|----------------|------------------|------------------|------------------|------------------|-------------------|-------------------|-------------------|-------------------|
|                          |         |                | SO <sub>ST</sub> | DD <sub>ST</sub> | SO <sub>TS</sub> | DD <sub>TS</sub> | SO <sub>HRM</sub> | DD <sub>HRM</sub> | SO <sub>ALL</sub> | DD <sub>ALL</sub> |
| 1-2009                   | 3837    | 1.22           | 0.9111           | 0.8976           | 0.8417           | 0.8362           | 0.8895            | 0.8846            | <b>0.9185</b>     | 0.9035            |
| 2-2009                   | 1349    | 1.24           | 0.8502           | 0.8626           | 0.8424           | 0.8367           | 0.8742            | 0.8665            | <b>0.8809</b>     | 0.8747            |
| 3-2009                   | 1962    | 1.22           | 0.8853           | 0.8905           | 0.8647           | 0.8600           | 0.9005            | 0.8872            | <b>0.9163</b>     | 0.9061            |
| 4-2009                   | 3382    | 1.20           | 0.9219           | 0.9099           | 0.8506           | 0.8439           | 0.9095            | 0.8905            | <b>0.9364</b>     | 0.9180            |
| 5-2009                   | 2809    | 1.16           | 0.8828           | 0.8822           | 0.8671           | 0.8594           | 0.9051            | 0.8919            | <b>0.9129</b>     | 0.9010            |
| 6-2009                   | 1032    | 1.12           | 0.8803           | 0.9005           | 0.8927           | 0.8871           | 0.9175            | 0.8957            | <b>0.9277</b>     | 0.9224            |
| 7-2009                   | 701     | 1.12           | 0.8519           | 0.8620           | 0.8699           | 0.8646           | 0.8899            | 0.8689            | <b>0.8907</b>     | 0.8853            |
| 8-2009                   | 1229    | 1.15           | 0.8881           | 0.8952           | 0.8879           | 0.8815           | 0.8924            | 0.8697            | <b>0.9136</b>     | 0.9049            |
| 9-2009                   | 401     | 1.15           | 0.8128           | 0.8431           | 0.8606           | 0.8618           | 0.8785            | 0.8662            | 0.8772            | <b>0.8796</b>     |
| 10-2009                  | 873     | 1.23           | 0.8890           | 0.8974           | 0.8799           | 0.8727           | 0.9207            | 0.9022            | <b>0.9219</b>     | 0.9140            |
| 11-2009                  | 609     | 1.25           | 0.8140           | 0.8387           | 0.8402           | 0.8380           | <b>0.8855</b>     | 0.8721            | 0.8718            | 0.8700            |
| 12-2009                  | 382     | 1.30           | 0.8281           | 0.8568           | 0.8771           | 0.8763           | <b>0.8861</b>     | 0.8782            | 0.8807            | 0.8853            |
| 1-2010                   | 458     | 1.32           | 0.7625           | 0.7789           | 0.7837           | 0.7833           | <b>0.8142</b>     | 0.8028            | 0.8098            | 0.8127            |
| 2-2010                   | 432     | 1.37           | 0.7084           | 0.7427           | 0.7320           | 0.7321           | 0.7725            | 0.7667            | 0.7721            | <b>0.7756</b>     |
| 3-2010                   | 173     | 1.44           | 0.7866           | 0.8620           | 0.8426           | 0.8460           | 0.8857            | 0.8909            | 0.8841            | <b>0.8958</b>     |
| 4-2010                   | 835     | 1.56           | 0.8505           | 0.8557           | 0.8081           | 0.8059           | <b>0.8851</b>     | 0.8740            | 0.8823            | 0.8786            |
| 5-2010                   | 2031    | 1.59           | 0.8770           | 0.8761           | 0.8245           | 0.8218           | 0.8856            | 0.8779            | <b>0.9001</b>     | 0.8913            |
| 6-2010                   | 1390    | 1.65           | 0.9206           | 0.9175           | 0.8528           | 0.8508           | 0.9229            | 0.9124            | <b>0.9397</b>     | 0.9303            |
| 7-2010                   | 979     | 1.65           | 0.8272           | 0.8337           | 0.8069           | 0.8077           | <b>0.8604</b>     | 0.8599            | 0.8566            | 0.8550            |
| 8-2010                   | 387     | 1.64           | 0.8261           | 0.8320           | 0.8040           | 0.8047           | 0.8542            | 0.8540            | <b>0.8568</b>     | 0.8533            |
| 9-2010                   | 577     | 1.65           | 0.8726           | 0.8796           | 0.8165           | 0.8164           | 0.8757            | 0.8743            | <b>0.8882</b>     | 0.8854            |
| 10-2010                  | 349     | 1.60           | 0.6839           | 0.7006           | 0.7173           | 0.7209           | <b>0.7746</b>     | 0.7616            | 0.7422            | 0.7457            |
| 11-2010                  | 499     | 1.63           | 0.8399           | 0.8458           | 0.8037           | 0.8045           | <b>0.8822</b>     | 0.8700            | 0.8815            | 0.8776            |
| 12-2010                  | 247     | 1.61           | 0.7777           | 0.8106           | 0.7754           | 0.7742           | 0.8195            | 0.8204            | 0.8293            | <b>0.8350</b>     |
| average                  | 1121.8  | 1.38           | 0.8395           | 0.8530           | 0.8309           | 0.8286           | 0.8743            | 0.8641            | <b>0.8788</b>     | 0.8751            |
| $ E_t  < 500$            |         |                | 0.7807           | 0.8081           | 0.7996           | 0.8004           | 0.8408            | 0.8345            | 0.8371            | 0.8401            |
| p-value                  |         |                |                  | 0.0023           |                  | 0.1011           |                   | 0.9883            |                   | 0.0447            |
| $500 \leq  E_t  < 1000$  |         |                | 0.8509           | 0.8612           | 0.8369           | 0.8342           | 0.8862            | 0.8753            | 0.8852            | 0.8814            |
| p-value                  |         |                |                  | 0.0087           |                  | 0.0417           |                   | 0.9874            |                   | 0.9944            |
| $1000 \leq  E_t  < 1500$ |         |                | 0.8848           | 0.8940           | 0.8689           | 0.8640           | 0.9017            | 0.8861            | 0.9155            | 0.9081            |
| p-value                  |         |                |                  | 0.0786           |                  | 0.9919           |                   | 0.9867            |                   | 0.9977            |
| $1500 \leq  E_t $        |         |                | 0.8956           | 0.8913           | 0.8498           | 0.8442           | 0.8981            | 0.8864            | 0.9169            | 0.9040            |
| p-value                  |         |                |                  | 0.8511           |                  | 0.9985           |                   | 0.9955            |                   | 0.9991            |

**Table B.3** Link prediction results (AUC values) for the Facebook500 friend network.

| month-year      | new $ E_t $ | $\hat{\alpha}$ | Static           |                  | HRM               |                   | All               |                   |
|-----------------|-------------|----------------|------------------|------------------|-------------------|-------------------|-------------------|-------------------|
|                 |             |                | SO <sub>ST</sub> | DD <sub>ST</sub> | SO <sub>HRM</sub> | DD <sub>HRM</sub> | SO <sub>ALL</sub> | DD <sub>ALL</sub> |
| 9-2006~10-2006  | 54          | 0.98           | 0.9336           | 0.9529           | <b>0.9751</b>     | 0.9727            | 0.9638            | 0.9721            |
| 11-2006~12-2006 | 27          | 1.18           | 0.9030           | 0.9268           | 0.8602            | 0.8607            | 0.9161            | <b>0.9344</b>     |
| 1-2007~2-2007   | 23          | 1.31           | 0.9118           | <b>0.9314</b>    | 0.9161            | 0.9122            | 0.9186            | 0.9255            |
| 3-2007~4-2007   | 26          | 1.38           | 0.9111           | 0.9392           | 0.9450            | <b>0.9525</b>     | 0.9216            | 0.9432            |
| 5-2007~6-2007   | 28          | 1.46           | 0.9139           | 0.9406           | 0.9202            | 0.9232            | 0.9378            | <b>0.9435</b>     |
| 7-2007~8-2007   | 28          | 1.53           | 0.9189           | 0.9471           | 0.8887            | 0.8867            | 0.9525            | <b>0.9652</b>     |
| 9-2007~10-2007  | 41          | 1.59           | 0.8335           | 0.8733           | 0.8285            | 0.8222            | 0.8574            | <b>0.8762</b>     |
| 11-2007~12-2007 | 44          | 1.64           | 0.8781           | 0.9023           | 0.8670            | 0.8696            | 0.9115            | <b>0.9143</b>     |
| 1-2008~2-2008   | 26          | 1.70           | 0.7744           | 0.7934           | 0.7220            | 0.6993            | 0.7978            | <b>0.8026</b>     |
| 3-2008~4-2008   | 77          | 1.74           | 0.8761           | 0.8963           | 0.8803            | 0.8789            | 0.9122            | <b>0.9165</b>     |
| 5-2008~6-2008   | 45          | 1.81           | 0.8433           | 0.8594           | <b>0.8799</b>     | 0.8756            | 0.8620            | 0.8667            |
| 7-2008~8-2008   | 43          | 1.86           | 0.8281           | 0.9138           | 0.8903            | 0.8984            | 0.8832            | <b>0.9241</b>     |
| 9-2008~10-2008  | 51          | 1.90           | 0.8249           | 0.8781           | 0.8312            | 0.8338            | 0.8586            | <b>0.8784</b>     |
| 11-2008~12-2008 | 47          | 1.93           | 0.8425           | <b>0.8888</b>    | 0.8148            | 0.8160            | 0.8712            | 0.8832            |
| average         | 40.0        | 1.57           | 0.8709           | 0.9031           | 0.8728            | 0.8716            | 0.8975            | <b>0.9104</b>     |
| p-value         |             |                |                  | 0.0000           |                   | 0.7291            |                   | 0.0002            |

**Table B.4** Link prediction results (AUC values) for the Facebook1000 friend network.

| month-year      | new $ E_t $ | $\hat{\alpha}$ | Static           |                  | HRM               |                   | All               |                   |
|-----------------|-------------|----------------|------------------|------------------|-------------------|-------------------|-------------------|-------------------|
|                 |             |                | SO <sub>ST</sub> | DD <sub>ST</sub> | SO <sub>HRM</sub> | DD <sub>HRM</sub> | SO <sub>ALL</sub> | DD <sub>ALL</sub> |
| 9-2006~10-2006  | 110         | 0.63           | 0.9205           | <b>0.9421</b>    | 0.8481            | 0.8461            | 0.9169            | 0.9338            |
| 11-2006~12-2006 | 61          | 0.86           | 0.8763           | <b>0.9027</b>    | 0.8435            | 0.8432            | 0.8752            | 0.8980            |
| 1-2007~2-2007   | 63          | 1.01           | 0.9265           | <b>0.9478</b>    | 0.8827            | 0.8825            | 0.9184            | 0.9375            |
| 3-2007~4-2007   | 74          | 1.10           | 0.8869           | <b>0.9082</b>    | 0.7120            | 0.7026            | 0.8789            | 0.9049            |
| 5-2007~6-2007   | 75          | 1.20           | 0.9132           | <b>0.9373</b>    | 0.7992            | 0.8005            | 0.9103            | 0.9315            |
| 7-2007~8-2007   | 123         | 1.27           | 0.8977           | <b>0.9222</b>    | 0.8152            | 0.8140            | 0.8915            | 0.9106            |
| 9-2007~10-2007  | 108         | 1.35           | 0.8446           | <b>0.8859</b>    | 0.7572            | 0.7529            | 0.8446            | 0.8805            |
| 11-2007~12-2007 | 97          | 1.41           | 0.8419           | <b>0.8653</b>    | 0.7868            | 0.7761            | 0.8419            | 0.8616            |
| 1-2008~2-2008   | 104         | 1.46           | 0.7476           | <b>0.8180</b>    | 0.7310            | 0.7190            | 0.7476            | 0.7815            |
| 3-2008~4-2008   | 207         | 1.52           | 0.8898           | 0.9223           | 0.7399            | 0.7405            | 0.8898            | <b>0.9230</b>     |
| 5-2008~6-2008   | 143         | 1.58           | 0.8341           | <b>0.8924</b>    | 0.7799            | 0.7745            | 0.8341            | 0.8803            |
| 7-2008~8-2008   | 130         | 1.64           | 0.7998           | 0.8671           | 0.7074            | 0.7111            | 0.7998            | <b>0.8675</b>     |
| 9-2008~10-2008  | 138         | 1.69           | 0.8228           | <b>0.8740</b>    | 0.7138            | 0.7162            | 0.8228            | 0.8728            |
| 11-2008~12-2008 | 167         | 1.73           | 0.7587           | 0.8131           | 0.6591            | 0.6616            | 0.7587            | <b>0.8135</b>     |
| average         | 114.3       | 1.32           | 0.8543           | <b>0.8927</b>    | 0.7697            | 0.7672            | 0.8522            | 0.8855            |
| p-value         |             |                |                  | 0.0000           |                   | 0.9534            |                   | 0.0000            |
